# Supplementary material for: Structural features of selenate based {Mo132} keplerate capsules
Source: Royal Society of Chemistry journal article supplement (doi:10.1039/d1ce01121a), 2021-11-13
Supplement: d1ce01121a2.pdf [file d1ce01121a2.pdf]

# Structural features of selenate based $\{\text{Mo}_{132}\}$ keplerate capsules

Vladimir S. Korenev,<sup>\*a</sup> Pavel V. Dorovatovskii,<sup>b</sup> Vladimir A. Lazarenko,<sup>b</sup> Pavel A. Abramov<sup>a</sup> and Maxim N. Sokolov<sup>a</sup>

## Supporting information

**Table S1.** Crystal data and structure refinement

**Fig. S1.** IR spectra of keplerate compounds **1** and **2**.

**Fig. S2.** (a) Raman spectra of **2** in aqueous solution (*black*) and in solid state (*red*). (b) Raman spectra of **1** (*blue*) and **2** (*black*) in aqueous solution.

**Fig. S3.** The contacts between keplerate anions.

**Fig. S4.** Comparison of experimental and calculated X-ray diffraction patterns for compound **2**.

**Fig. S5.** Comparison of experimental and calculated X-ray diffraction patterns for compound **3**.

## Gas adsorption report

**Fig. S6.** Nitrogen adsorption-desorption isotherms at 77 K.

**Fig. S7.** Carbon-dioxide adsorption-desorption isotherms at 195 K.

**Table S2.** The parameters of porous structure of samples under investigation.

**Table S1.** Crystal data and structure refinement for **2-4**

|                                                                                                           | <b>2</b>                                                                                                                                                                                                      | <b>3</b>                                                                                                                             | <b>4</b>                                                                                                                                                                                                      |
|-----------------------------------------------------------------------------------------------------------|---------------------------------------------------------------------------------------------------------------------------------------------------------------------------------------------------------------|--------------------------------------------------------------------------------------------------------------------------------------|---------------------------------------------------------------------------------------------------------------------------------------------------------------------------------------------------------------|
| <b>Chemical formula</b>                                                                                   | Mo <sub>132</sub> N <sub>25.80</sub> O <sub>628.56</sub> Se <sub>30</sub>                                                                                                                                     | C <sub>21.80</sub> H <sub>130.80</sub> Cl <sub>3</sub> Mo <sub>132</sub> N <sub>65.40</sub> O <sub>581.40</sub> S<br>e <sub>30</sub> | Mo <sub>132</sub> N <sub>32.70</sub> O <sub>594.24</sub> Se <sub>30</sub>                                                                                                                                     |
| $M_r$                                                                                                     | 25451.30                                                                                                                                                                                                      | 25751.54                                                                                                                             | 24998.85                                                                                                                                                                                                      |
| <b>Crystal system, space group</b>                                                                        | Trigonal, $R\bar{3}:H$                                                                                                                                                                                        | Trigonal, $R\bar{3}c:H$                                                                                                              | Trigonal, $R\bar{3}:H$                                                                                                                                                                                        |
| <b>Temperature (K)</b>                                                                                    | 130                                                                                                                                                                                                           | 100                                                                                                                                  | 130                                                                                                                                                                                                           |
| $a, c$ (Å)                                                                                                | 32.7739 (5), 73.5789 (11)                                                                                                                                                                                     | 50.337 (7), 61.099 (12)                                                                                                              | 32.6962 (5), 74.0599 (12)                                                                                                                                                                                     |
| $V$ (Å <sup>3</sup> )                                                                                     | 68445 (2)                                                                                                                                                                                                     | 134072 (46)                                                                                                                          | 68566 (2)                                                                                                                                                                                                     |
| $Z$                                                                                                       | 3                                                                                                                                                                                                             | 6                                                                                                                                    | 3                                                                                                                                                                                                             |
| <b>Radiation type</b>                                                                                     | Mo $K\alpha$                                                                                                                                                                                                  | Synchrotron, $\lambda = 0.79272$ Å                                                                                                   | Mo $K\alpha$                                                                                                                                                                                                  |
| $\mu$ (mm <sup>-1</sup> )                                                                                 | 3.03                                                                                                                                                                                                          | 4.16                                                                                                                                 | 3.02                                                                                                                                                                                                          |
| <b>Crystal size (mm)</b>                                                                                  | 0.30 × 0.20 × 0.20                                                                                                                                                                                            | 0.30 × 0.20 × 0.20                                                                                                                   | 0.40 × 0.20 × 0.20                                                                                                                                                                                            |
| <b>Diffractometer</b>                                                                                     | New Xcalibur, AtlasS2                                                                                                                                                                                         | Rayonix SX-165 CCD                                                                                                                   | New Xcalibur, AtlasS2                                                                                                                                                                                         |
| <b>Radiation source</b>                                                                                   | fine-focus sealed tube                                                                                                                                                                                        | synchrotron                                                                                                                          | fine-focus sealed tube                                                                                                                                                                                        |
| <b>Absorption correction</b>                                                                              | Multi-scan<br><i>CrysAlis PRO</i> 1.171.38.41<br>(Rigaku Oxford Diffraction,<br>2015) Empirical absorption<br>correction using spherical<br>harmonics, implemented in<br>SCALE3 ABSPACK<br>scaling algorithm. | Multi-scan<br>XDS (Kabsch, 2010)                                                                                                     | Multi-scan<br><i>CrysAlis PRO</i> 1.171.38.41<br>(Rigaku Oxford Diffraction,<br>2015) Empirical absorption<br>correction using spherical<br>harmonics, implemented in<br>SCALE3 ABSPACK<br>scaling algorithm. |
| $T_{\min}, T_{\max}$                                                                                      | 0.967, 1.000                                                                                                                                                                                                  | 0.846, 1.000                                                                                                                         | 0.857, 1.000                                                                                                                                                                                                  |
| <b>No. of measured,<br/>independent and<br/>observed [<math>I &gt; 2\sigma(I)</math>]<br/>reflections</b> | 51926, 27808, 18484                                                                                                                                                                                           | 287412, 34107, 23366                                                                                                                 | 49870, 27083, 20284                                                                                                                                                                                           |
| $R_{\text{int}}$                                                                                          | 0.038                                                                                                                                                                                                         | 0.078                                                                                                                                | 0.020                                                                                                                                                                                                         |
| <b><math>\theta</math> values (°)</b>                                                                     | $\theta_{\max} = 25.4, \theta_{\min} = 3.3$                                                                                                                                                                   | $\theta_{\max} = 31.0, \theta_{\min} = 1.4$                                                                                          | $\theta_{\max} = 25.4, \theta_{\min} = 3.4$                                                                                                                                                                   |
| $(\sin \theta/\lambda)_{\max}$ (Å <sup>-1</sup> )                                                         | 0.602                                                                                                                                                                                                         | 0.650                                                                                                                                | 0.602                                                                                                                                                                                                         |
| <b>Range of <math>h, k, l</math></b>                                                                      | -24 ≤ $h$ ≤ 36,<br>-33 ≤ $k$ ≤ 39,<br>-73 ≤ $l$ ≤ 88                                                                                                                                                          | -65 ≤ $h$ ≤ 59,<br>-65 ≤ $k$ ≤ 65,<br>-78 ≤ $l$ ≤ 79                                                                                 | -15 ≤ $h$ ≤ 38,<br>-33 ≤ $k$ ≤ 33,<br>-74 ≤ $l$ ≤ 89                                                                                                                                                          |
| $R[F^2 > 2\sigma(F^2)], wR(F^2), S$                                                                       | 0.070, 0.244, 1.15                                                                                                                                                                                            | 0.092, 0.319, 1.21                                                                                                                   | 0.072, 0.234, 1.05                                                                                                                                                                                            |
| <b>No. of reflections,<br/>parameters, restraints</b>                                                     | 27808, 1288, 24                                                                                                                                                                                               | 34107, 1294, 90                                                                                                                      | 27083, 1277, 0                                                                                                                                                                                                |
| <b>H-atom treatment</b>                                                                                   | –                                                                                                                                                                                                             | H-atom parameters constrained                                                                                                        | –                                                                                                                                                                                                             |
| <b>Weighting scheme</b>                                                                                   | $w = 1/[\sigma^2(F_o^2) + (0.1345P)^2 + 512.9554P]$ , where $P = (F_o^2 + 2F_c^2)/3$                                                                                                                          | $w = 1/[\sigma^2(F_o^2) + (0.2P)^2]$ , where $P = (F_o^2 + 2F_c^2)/3$                                                                | $w = 1/[\sigma^2(F_o^2) + (0.1222P)^2 + 3703.9001P]$ , where $P = (F_o^2 + 2F_c^2)/3$                                                                                                                         |
| $\Delta\rho_{\max}, \Delta\rho_{\min}$ (e Å <sup>-3</sup> )                                               | 2.09, -3.35                                                                                                                                                                                                   | 1.81, -4.05                                                                                                                          | 1.51, -3.03                                                                                                                                                                                                   |

Computer programs: *CrysAlis PRO* 1.171.38.41 (Rigaku OD, 2015), Marccd (Doyle, 2011), XDS (Kabsch, 2010), *SHELXS2014* (Sheldrick, 2014), *SHELXT2018* (Sheldrick, 2015), *SHELXL2014* (Sheldrick, 2014), *SHELXL2018* (Sheldrick, 2015), ShelXle (Hübschle, 2011), CIFTAB-2014 (Sheldrick, 2014), CIFTAB (Sheldrick, 2015).

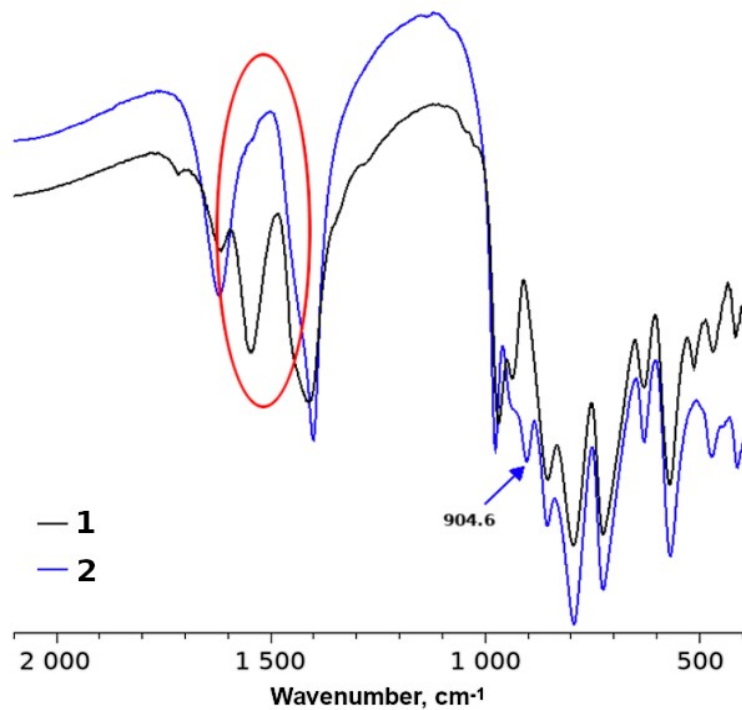

**Fig. S1.** IR spectra of keplerate compounds 1 and 2.

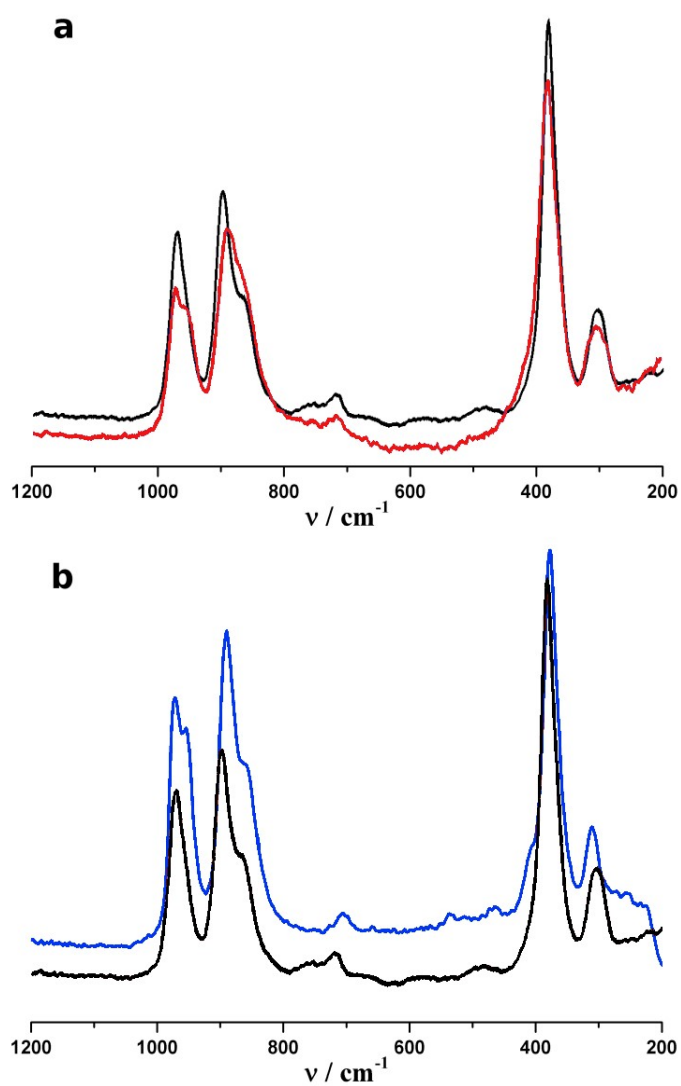

**Fig. S2.** (a) Raman spectra of 2 in aqueous solution (*black*) and in solid state (*red*). (b) Raman spectra of 1 (*blue*) and 2 (*black*) in aqueous solution.

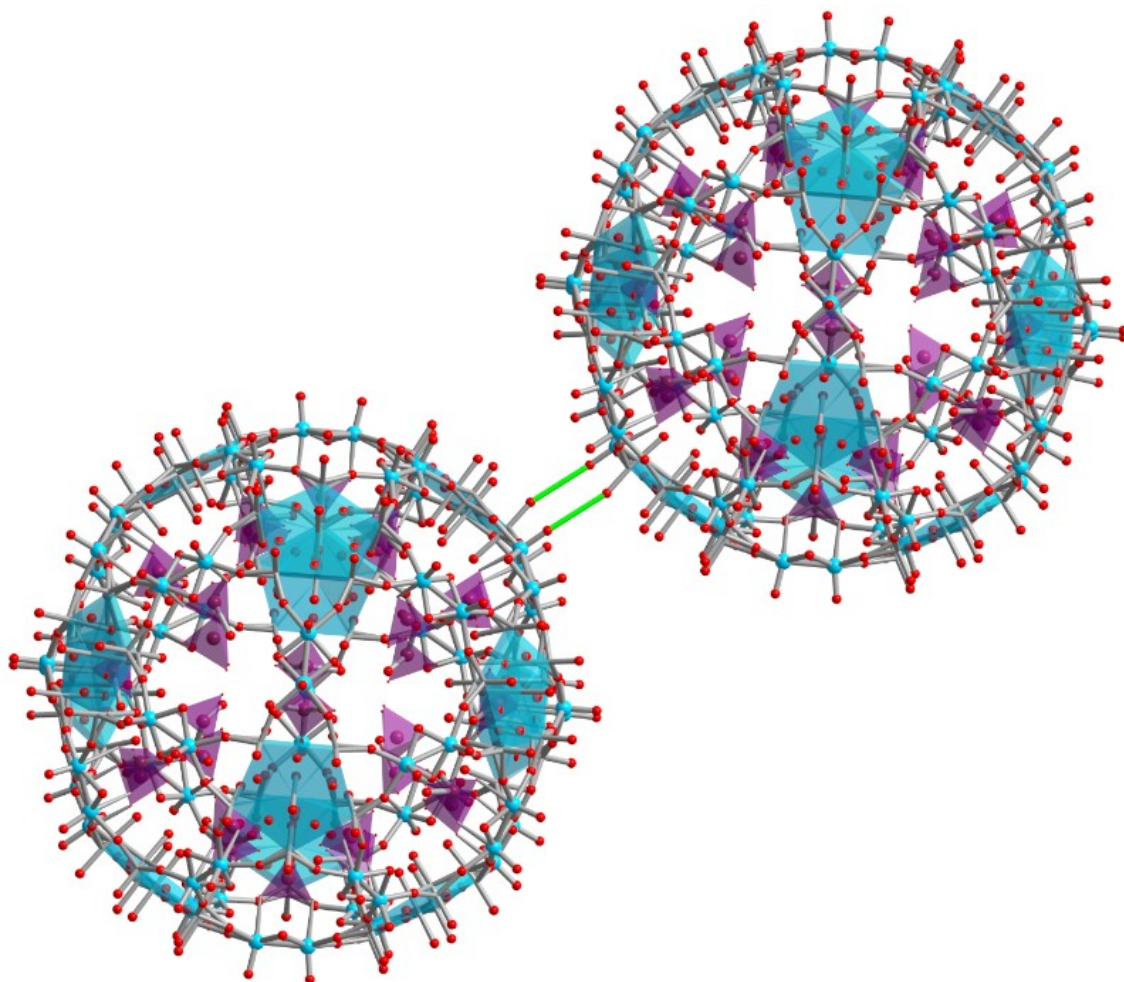

**Fig. S3.** The contacts between keplerate anions.

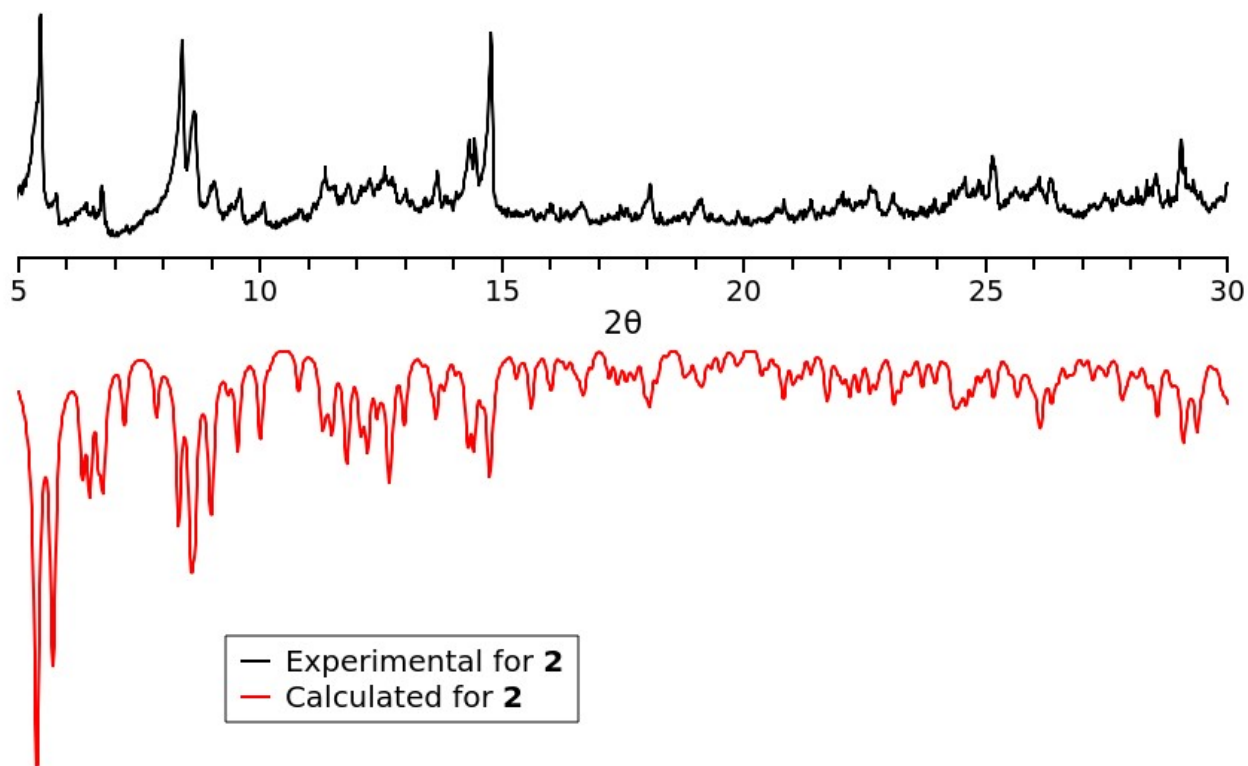

**Fig. S4.** Comparison of experimental and calculated X-ray diffraction patterns for compound **2**.

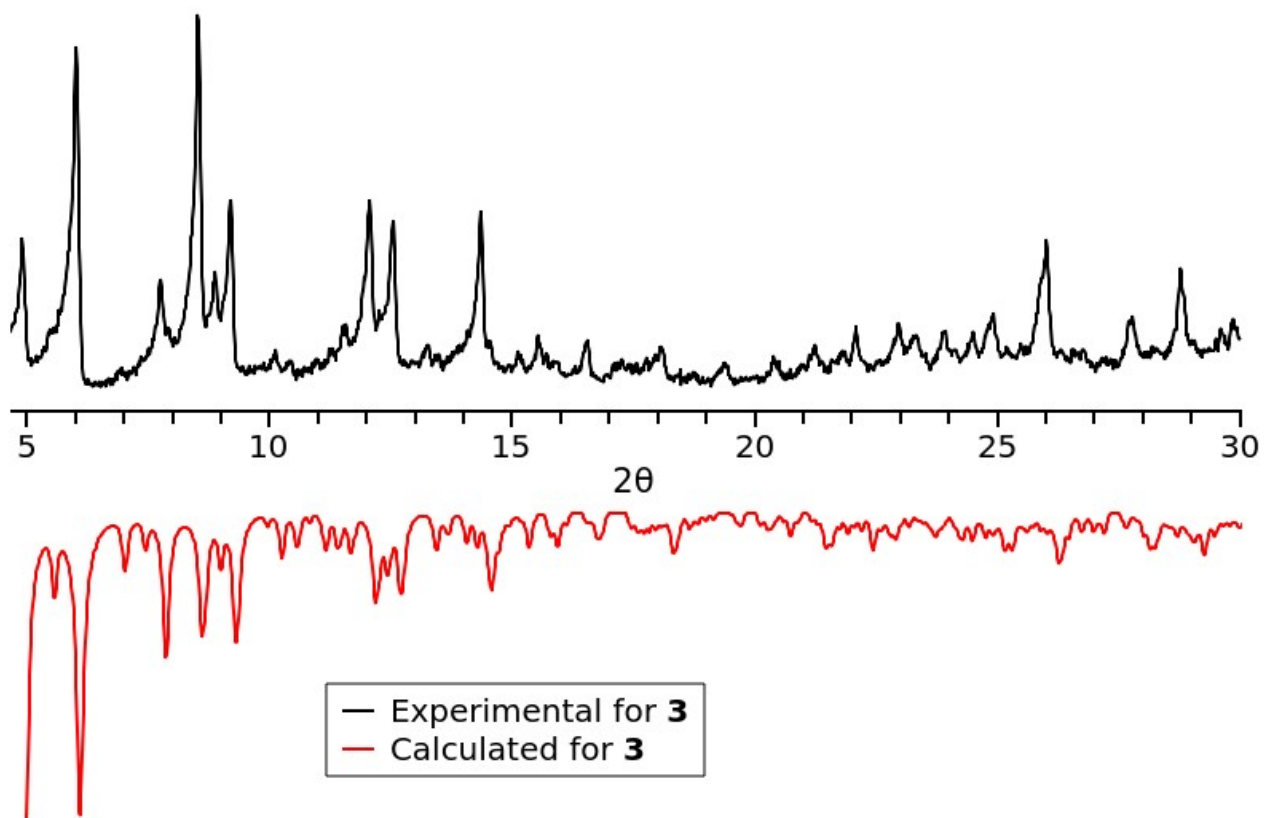

**Fig. S5.** Comparison of experimental and calculated X-ray diffraction patterns for compound **3**.

# Gas adsorption report

## Experimental section

**Surface Area and Porous Structure.** The porous structure was analyzed using the nitrogen adsorption at 77 K and carbon dioxide adsorption at 195 K on a Quantochrome's Autosorb iQ gas sorption analyzer. Initially, compounds were activated under a dynamic vacuum at 130 °C or 150 °C for 6 h. The N<sub>2</sub> and CO<sub>2</sub> adsorption–desorption isotherms were measured within the range of relative pressures from 10<sup>-6</sup> to 0.995 and from 10<sup>-3</sup> to 0.995 correspondingly. The specific surface area was calculated from the data obtained using the conventional BET model.

## Results

### Porous structure (Textural properties)

Measured isotherms of nitrogen adsorption at 77 K and carbon dioxide adsorption at 195 K are represented in Fig. S6, S7. Compounds under investigation are possessing type III isotherms according to official IUPAC classification, which is typical for non-porous compounds with relatively weak adsorbate–adsorbent interactions. Calculated BET surface areas are given in Table S2. Because of the absence of significant adsorption of nitrogen (kinetic diameter 0.364 Å) we tried to study the carbon dioxide adsorption, which molecules have lower kinetic diameter (0.33 Å) and often use for textural characterization of ultramicroporous adsorbents. Unfortunately, the carbon dioxide uptake at 195 K on both compounds was also negligible.

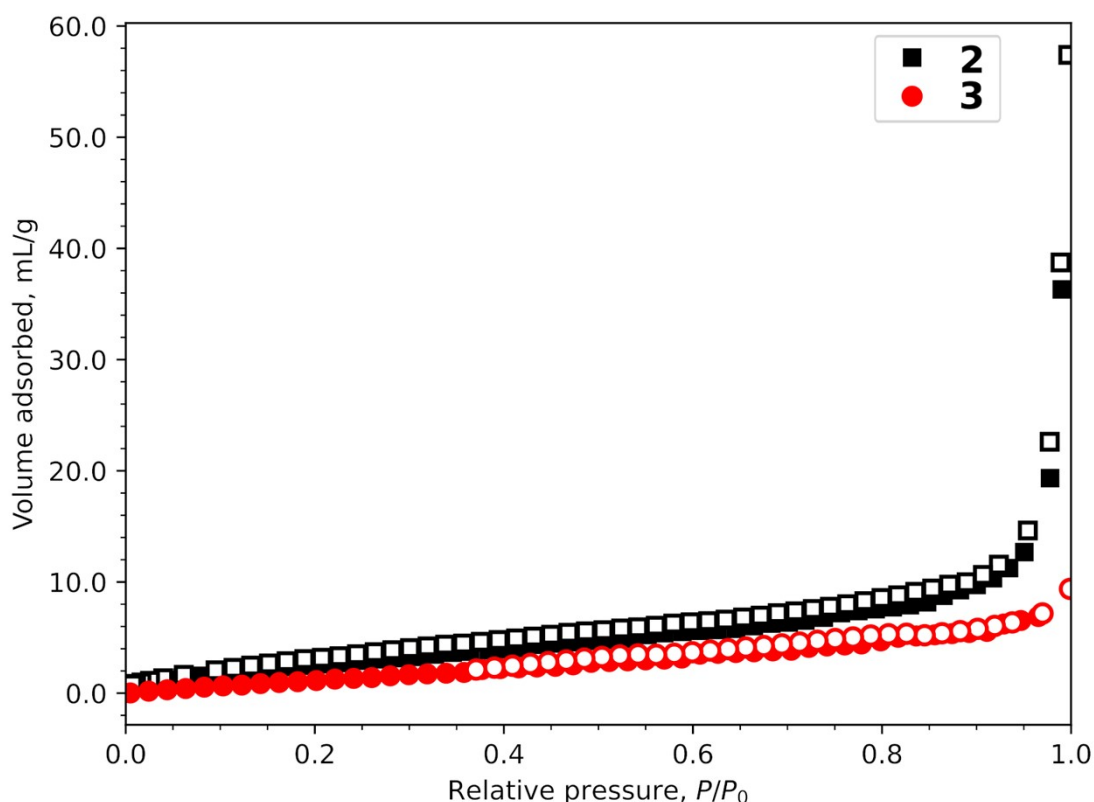

**Fig. S6.** Nitrogen adsorption-desorption isotherms at 77 K.

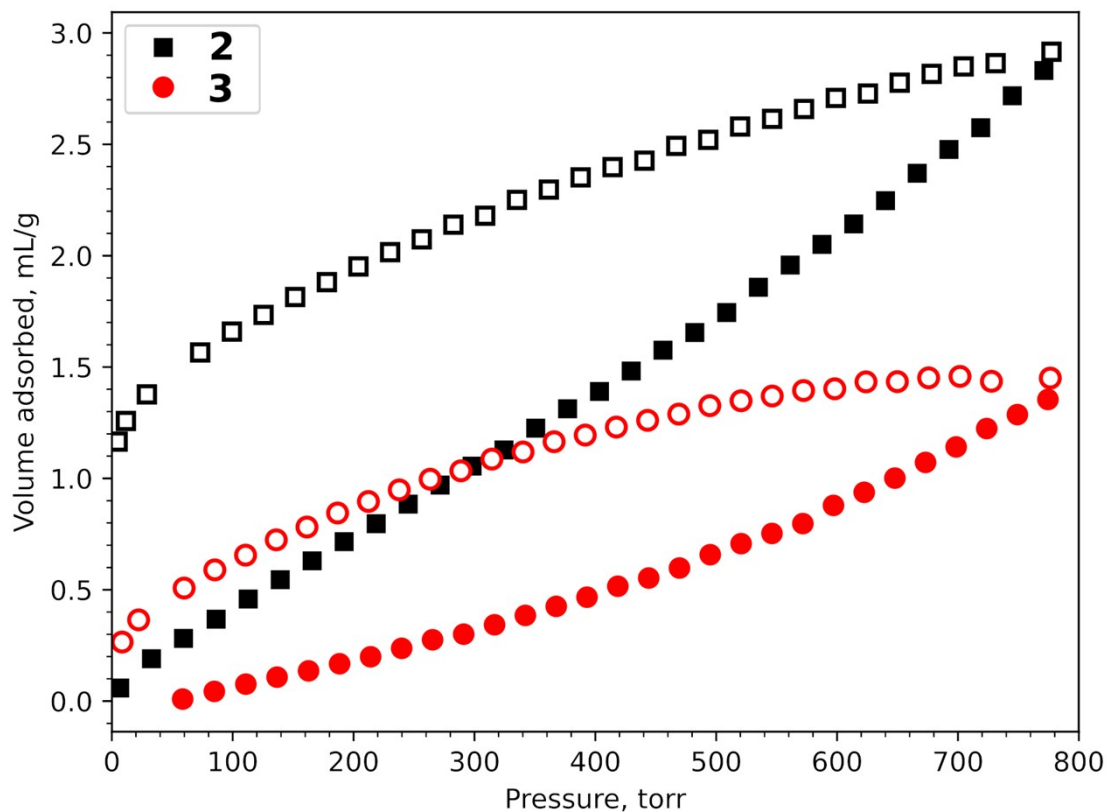

**Fig. S7.** Carbon-dioxide adsorption-desorption isotherms at 195 K.

**Table S2.** The parameters of porous structure of samples under investigation.

| Sample, gas@temperature | Specific surface area / $\text{m}^2 \cdot \text{g}^{-1}$ | $V_{\text{pore}} / \text{cm}^3 \cdot \text{g}^{-1}$ | $V_{\text{ads}}(\text{N}_2)^a / \text{cm}^3(\text{STP}) \cdot \text{g}^{-1}$ |
|-------------------------|----------------------------------------------------------|-----------------------------------------------------|------------------------------------------------------------------------------|
| 2, $\text{N}_2@77$ K    | 12.01                                                    | $\approx 0.015$                                     | 9.7                                                                          |
| 2, $\text{CO}_2@195$ K  | 3.8                                                      | $\approx 0.004$                                     | 2.6                                                                          |
| 3, $\text{N}_2@77$ K    | 8.4                                                      | $\approx 0.008$                                     | 5.5                                                                          |
| 3, $\text{CO}_2@195$ K  | 1.8                                                      | $\approx 0.002$                                     | 1.2                                                                          |

<sup>a</sup> total pore volume, measured at  $P/P_0 = 0.90$ .

So, both compounds are non-porous. Calculated BET surface area is attributed to external surface of crystallites and pore volume is corresponded to inter-crystallite volume due to their dense-packing.
